# Supplementary material for: A design of experiments screen reveals that Clostridium novyi-NT spore germinant sensing is stereoflexible for valine and its analogs
Source: PubMed Central journal article supplement (PMC9884283; doi:10.1038/s42003-023-04496-9), 2023-01-28
Supplement: 42003_2023_4496_MOESM1_ESM.pdf [file 42003_2023_4496_MOESM1_ESM.pdf]

# **A Design of Experiments screen reveals that *Clostridium novyi*-NT spore germinant sensing is stereoflexible for valine and its analogs**

Ajitha Sundaresan<sup>1,2</sup>, Mai Le Ngoc<sup>3,†</sup>, Marvell Ung Wew<sup>3,†</sup>, Varsha Ramkumar<sup>3,†</sup>, Prahlad Raninga<sup>1</sup>, Rongji Sum<sup>1,2</sup>, Ian Cheong<sup>1,2\*</sup>

<sup>1</sup> Temasek Life Sciences Laboratory, Singapore, Singapore

<sup>2</sup> Department of Biological Sciences, National University of Singapore, Singapore

<sup>3</sup> NUS High School of Mathematics and Sciences, Singapore, Singapore.

† These authors contributed equally

\*Correspondence to: [ian@tll.org.sg](mailto:ian@tll.org.sg)

## Plackett-Burman design used in initial screen

|                             |     | Amino Acid (single letter) |   |   |   |   |   |   |   |   |   |   |   |   |   |   |   |   |   |   |   |
|-----------------------------|-----|----------------------------|---|---|---|---|---|---|---|---|---|---|---|---|---|---|---|---|---|---|---|
|                             |     | E                          | T | F | P | Q | G | S | R | K | A | L | I | V | C | N | H | D | M | Y | W |
| Combinations of amino acids | R1  | +                          | + | + | + | + | + | + | + | + | + | + | + | + | + | + | + | + | + | + | + |
|                             | R2  | -                          | + | + | + | + | - | + | - | + | + | - | - | + | + | - | - | + | - | + | - |
|                             | R3  | -                          | - | + | + | + | + | - | + | - | + | + | - | - | + | + | - | - | + | - | + |
|                             | R4  | -                          | - | - | + | + | + | + | - | + | - | + | + | - | - | + | + | - | - | + | - |
|                             | R5  | -                          | - | - | - | + | + | + | + | - | + | - | + | + | - | - | + | + | - | - | + |
|                             | R6  | -                          | - | - | - | - | + | + | + | + | - | + | - | + | + | - | - | + | + | - | - |
|                             | R7  | +                          | - | - | - | - | - | + | + | + | + | - | + | - | + | + | - | - | + | + | - |
|                             | R8  | -                          | + | - | - | - | - | - | + | + | + | + | - | + | - | + | + | - | - | + | + |
|                             | R9  | +                          | - | + | - | - | - | - | - | + | + | + | + | - | + | - | + | + | - | - | + |
|                             | R10 | -                          | + | - | + | - | - | - | - | - | + | + | + | + | - | + | - | + | + | - | - |
|                             | R11 | -                          | - | + | - | + | - | - | - | - | - | + | + | + | + | - | + | - | + | + | - |
|                             | R12 | +                          | - | - | + | - | + | - | - | - | - | - | - | + | + | + | + | - | + | - | + |
|                             | R13 | +                          | + | - | - | + | - | + | - | - | - | - | - | - | + | + | + | + | - | + | + |
|                             | R14 | -                          | + | + | - | - | + | - | + | - | - | - | - | - | + | + | + | + | - | + | - |
|                             | R15 | -                          | - | + | + | - | - | + | - | + | - | - | - | - | - | - | + | + | + | + | + |
|                             | R16 | +                          | - | - | + | + | - | - | + | - | + | - | - | - | - | - | - | + | + | + | + |
|                             | R17 | +                          | + | - | - | + | + | - | - | + | - | + | - | - | - | - | - | - | + | + | + |
|                             | R18 | -                          | + | + | - | - | + | + | - | - | + | - | + | - | - | - | - | - | - | + | + |
|                             | R19 | +                          | - | + | + | - | - | + | + | - | - | + | - | + | - | - | - | - | - | - | + |
|                             | R20 | -                          | + | - | + | + | - | - | + | + | - | - | + | - | + | - | - | - | - | - | + |
|                             | R21 | +                          | - | + | - | + | + | - | - | + | + | - | - | + | - | + | - | - | - | - | - |
|                             | R22 | +                          | + | - | + | - | + | + | - | - | + | + | - | - | + | - | + | - | - | - | - |
|                             | R23 | +                          | + | + | - | + | - | + | + | - | - | + | + | - | - | + | - | + | - | - | - |
|                             | R24 | +                          | + | + | + | - | + | - | + | + | - | - | + | + | - | - | + | - | + | - | - |

**Supplementary Table 1. Plackett Burman design with 24 combinations for 20 L-amino acids.** Rows indicated as R1-R24 represent each combination while columns represent the presence (+) or absence (-) of a single amino acid in each combination. L-amino acids are depicted by their single letter nomenclature and used at concentrations indicated in **Supplementary Table 3** when present.

## Full Factorial experimental designs used in this study

| Relevant Figure                | Class of factors tested    | Factors tested |     |     |     |     |   |
|--------------------------------|----------------------------|----------------|-----|-----|-----|-----|---|
|                                |                            | C              | V   | T   | H   | A   |   |
| Figs. 2a-c                     | Amino acid (single letter) | C              | V   | T   | H   | A   |   |
| Figs. 2d-f                     | Amino acid (single letter) | C              | G   | K   | R   | W   |   |
| Figs. 3a-c, Suppl. Figs. S2a,b | Purines (3-letter)         | Hyp            | Ino | Ado | Xao | Xan |   |
|                                | Combinations of factors    | R1             | +   | -   | +   | +   | + |
|                                |                            | R2             | +   | +   | -   | -   | - |
|                                |                            | R3             | -   | +   | -   | -   | - |
|                                |                            | R4             | +   | +   | +   | +   | - |
|                                |                            | R5             | -   | +   | +   | -   | + |
|                                |                            | R6             | -   | -   | -   | +   | - |
|                                |                            | R7             | -   | -   | -   | -   | + |
|                                |                            | R8             | +   | +   | +   | -   | - |
|                                |                            | R9             | +   | +   | -   | -   | + |
|                                |                            | R10            | -   | -   | +   | -   | + |
|                                |                            | R11            | -   | +   | -   | +   | - |
|                                |                            | R12            | -   | -   | +   | +   | + |
|                                |                            | R13            | +   | +   | +   | +   | + |
|                                |                            | R14            | -   | -   | +   | +   | - |
|                                |                            | R15            | +   | +   | -   | +   | - |
|                                |                            | R16            | -   | -   | -   | +   | + |
|                                |                            | R17            | -   | +   | +   | +   | + |
|                                |                            | R18            | +   | -   | +   | -   | - |
|                                |                            | R19            | -   | +   | +   | +   | - |
|                                |                            | R20            | +   | -   | -   | -   | - |
|                                |                            | R21            | +   | +   | -   | +   | + |
|                                |                            | R22            | +   | -   | -   | +   | - |
|                                |                            | R23            | +   | -   | -   | -   | + |
|                                |                            | R24            | +   | +   | +   | -   | + |
|                                |                            | R25            | +   | -   | +   | +   | - |
|                                |                            | R26            | -   | +   | -   | -   | + |
|                                |                            | R27            | +   | -   | -   | +   | + |
|                                |                            | R28            | -   | +   | -   | +   | + |
|                                |                            | R29            | -   | -   | -   | -   | - |
|                                |                            | R30            | -   | -   | +   | -   | - |
|                                |                            | R31            | -   | +   | +   | -   | - |
|                                |                            | R32            | +   | -   | +   | -   | + |

**Supplementary Table 2. Full factorial design with 32 combinations for five factors.** Rows of the matrix labeled R1-R32 represent each combination while columns represent the presence (+) or absence (-) of a single factor (amino acid or purine). Amino acids are indicated by their single letter nomenclature while for purines the three-letter code was used as follows - Hyp-hypoxanthine, Ino-Inosine, Ado-Adenosine, Xao-Xanthosine, Xan-Xanthine. Factors are used at concentrations as depicted in **Supplementary Table 3** when present.

| CANONICAL AMINO ACIDS               | L-amino acid    |                  | D-amino acid |           |
|-------------------------------------|-----------------|------------------|--------------|-----------|
|                                     | Cat. No.        | Conc (mM)        | Cat. No.     | Conc (mM) |
| Glutamic acid                       | G8415           | 1                | G1001        | 1.5       |
| Threonine                           | T8441           | 15               | T8250        | 30        |
| Phenylalanine                       | P5482           | 5                | P1751        | 7.4       |
| Proline                             | P5607           | 15               | 858919       | 147       |
| Glutamine                           | G8540           | 5                | G9003        | 29        |
| Glycine                             | G7126           | 100              | -            | -         |
| Serine                              | S4311           | 20               | S4250        | 147       |
| Arginine                            | A8094           | 35               | A2646        | 0.3       |
| Lysine                              | L5501           | 30               | L8021        | 36.5      |
| Alanine                             | A7469           | 85               | A7377        | 73        |
| Leucine                             | L8912           | 5                | 855448       | 7.4       |
| Isoleucine                          | I7403           | 10               | I7634        | 15        |
| Valine                              | V0513           | 15               | 855987       | 19        |
| Cysteine                            | C7352           | 45               | 30095        | 7         |
| Asparagine                          | A4159           | 15               | 441597       | 19        |
| Histidine                           | H6034           | 10               | SC 255057    | 15        |
| Aspartic acid                       | A7219           | 1                | 219096       | 1         |
| Methionine                          | M5308           | 5                | M9375        | 7.4       |
| Tyrosine                            | T8566           | 0.4              | 855456       | 0.2       |
| Tryptophan                          | T8941           | 2                | T9753        | 0.7       |
|                                     |                 |                  |              |           |
| <b>NON-CANONICAL CANDIDATES</b>     | <b>Cat. No.</b> | <b>Conc (mM)</b> |              |           |
| L-Norvaline                         | N7627           | 91.5             |              |           |
| D-Norvaline                         | 851620          | 91.5             |              |           |
| L-2-Aminobutyric acid (L-AABA)      | A1879           | 91.5             |              |           |
| D-2-Aminobutyric acid (D-AABA)      | 116122          | 91.5             |              |           |
| (S)-3-Aminobutyric acid ((S)-3-ABA) | 757454          | 91.5             |              |           |
| 4-Aminobutyric acid (4-ABA)         | A2129           | 91.5             |              |           |
| $\beta$ -Alanine                    | 146064          | 91.5             |              |           |
| (R)-2-Hydroxybutyric acid           | 54917           | 91.5             |              |           |
| L-2-Hydroxyisovaleric acid          | 379093          | 91.5             |              |           |
| D-2-Hydroxyisovaleric acid          | 55452           | 91.5             |              |           |
| Sodium (R)-3-Hydroxy-isobutyrate    | 11161           | 91.5             |              |           |
| Sodium (S)-3-Hydroxy-isobutyrate    | 16842           | 91.5             |              |           |
| Sodium-3-Methyl-2-oxobutyrate       | 198994          | 91.5             |              |           |
| Butyric acid                        | B103500         | 91.5             |              |           |
| Isovaleric acid                     | 129542          | 91.5             |              |           |
|                                     |                 |                  |              |           |
| <b>PURINES</b>                      | <b>Cat. No.</b> | <b>Conc (mM)</b> |              |           |
| Hypoxanthine (Hx)                   | H9377           | 0.1              |              |           |
| Inosine (Ino)                       | I4125           | 0.1              |              |           |
| Adenosine (Ado)                     | A4036           | 0.1              |              |           |
| Xanthine (Xan)                      | X7375           | 0.1              |              |           |
| Xanthosine (Xao)                    | X0750           | 0.1              |              |           |

**Supplementary Table 3. Concentrations of all candidate germinants used in the screening experiments.**

| Figure                                                      | Term                                                                                                                                                                              | Definition                                                                         |
|-------------------------------------------------------------|-----------------------------------------------------------------------------------------------------------------------------------------------------------------------------------|------------------------------------------------------------------------------------|
|                                                             | $OD_{(0)}, OD_{(t)}$                                                                                                                                                              | OD600 at time = t or 0 respectively                                                |
|                                                             | $OD_{[+]}, OD_{[-]}$                                                                                                                                                              | OD600 in the presence [+] or absence [-] of the factor                             |
|                                                             | $\Delta OD_X$                                                                                                                                                                     | $OD_{(0)} - OD_{(t)}$ for condition X                                              |
|                                                             | $\% \Delta OD_X$                                                                                                                                                                  | $\frac{OD_{(0)} - OD_{(t)}}{OD_{(0)}} * 100\%$ for condition X                     |
|                                                             | $\overline{\Delta OD_X}$                                                                                                                                                          | $\frac{1}{N} \sum_{i=1}^N \Delta OD_{X,i}$ for condition X                         |
|                                                             | $\overline{\% \Delta OD_X}$                                                                                                                                                       | $\frac{1}{N} \sum_{i=1}^N \% \Delta OD_{X,i}$ for condition X                      |
| Figs. 1b,2a,2d,3a                                           | $\Delta OD$<br>(for each combination c among N combinations in one experiment)<br><br><i>Note: this definition of <math>\Delta OD</math> only applies to Figs. 1b, 2a, 2d, 3a</i> | $\frac{\Delta OD_C}{\max_n \{ \Delta OD_1 \cdots \Delta OD_N \}}$                  |
|                                                             | Mean $\Delta OD_{[+]}$ - Mean $\Delta OD_{[-]}$<br>(for a single factor f)                                                                                                        | $\overline{\Delta OD_{f,[+]}} - \overline{\Delta OD_{f,[-]}}$                      |
| Figs. 1c,4a,5a,5d,6a,6b;<br>Supplementary Figs. S2a,S2c,S2d | Germination %                                                                                                                                                                     | $\% \Delta OD_X$                                                                   |
| Figs. 2b,2e,3b                                              | Mean $\Delta OD$<br>(for a single factor f when absent [-] or present [+])                                                                                                        | $\overline{\Delta OD_{f,[+]}}$ or $\overline{\Delta OD_{f,[-]}}$                   |
| Figs. 5c,6c                                                 | Germination %<br>(for germinant j compared to D-valine at 91.5 mM)                                                                                                                | $\frac{\% \Delta OD_j}{\% \Delta OD_{Dvaline}}$                                    |
| Supplementary Fig. S1                                       | Standardized effect<br>(for a single factor f)                                                                                                                                    | $2 * \frac{\overline{\Delta OD_{f,[+]}} - \overline{\Delta OD_{f,[-]}}}{\sigma_M}$ |
| Supplementary Fig. S2a                                      | Mean $\% \Delta OD_{[+]}$ - Mean $\% \Delta OD_{[-]}$                                                                                                                             | $\overline{\% \Delta OD_{f,[+]}} - \overline{\% \Delta OD_{f,[-]}}$                |
| Supplementary Fig. S2b                                      | Mean $\% \Delta OD$<br>(for a single factor f when absent [-] or present [+])                                                                                                     | $\overline{\% \Delta OD_{f,[+]}}$ or $\overline{\% \Delta OD_{f,[-]}}$             |
| Supplementary Fig. S4                                       | Relative OD                                                                                                                                                                       | $\frac{OD_{(t)}}{OD_{(0)}}$                                                        |

**Supplementary Table 4. Summary table of formulae used to calculate the Y axes of graph figures.**  $OD_{(t)}$  refers to OD600 value at the end of the assay while  $OD_{(0)}$  refers to the OD600 value at the start of the assay.

| Figure                 | Graph description                                    | Condition              | Comparison with | n | Type of t-test | p value  | Significance level |
|------------------------|------------------------------------------------------|------------------------|-----------------|---|----------------|----------|--------------------|
| 1c                     | Single factor screen L-amino acids                   | L-cysteine             | L-valine        | 4 | Unpaired       | P<0.0001 | ****               |
|                        |                                                      | L-alanine              | L-valine        | 4 | Unpaired       | P<0.0001 | ****               |
| 4a                     | L-amino acid D-amino acid inhibition                 | L-cysteine-D-cysteine  | L-cysteine DIW  | 4 | Unpaired       | P<0.0001 | ****               |
|                        |                                                      | L-cysteine-D-alanine   | L-cysteine DIW  | 4 | Unpaired       | P<0.0001 | ****               |
|                        |                                                      | L-cysteine-D-valine    | L-cysteine DIW  | 4 | Unpaired       | 0.7434   | ns                 |
|                        |                                                      | L-alanine-D-cysteine   | L-alanine DIW   | 4 | Unpaired       | 0.7851   | ns                 |
|                        |                                                      | L-alanine-D-alanine    | L-alanine DIW   | 4 | Unpaired       | P<0.0001 | ****               |
|                        |                                                      | L-alanine-D-valine     | L-alanine DIW   | 4 | Unpaired       | 0.1281   | ns                 |
|                        |                                                      | L-valine-D-cysteine    | L-valine DIW    | 4 | Unpaired       | P<0.0001 | ****               |
|                        |                                                      | L-valine-D-alanine     | L-valine DIW    | 4 | Unpaired       | P<0.0001 | ****               |
|                        |                                                      | L-valine-D-valine      | L-valine DIW    | 4 | Unpaired       | P<0.0001 | ****               |
| 5a                     | Single factor screen D-amino acids                   | D-valine               | D-threonine     | 4 | Unpaired       | P<0.0001 | ****               |
| 5c                     | Dose response curve D-valine and other germinants    | L-valine               | D-valine        | 4 | Unpaired       | 0.0001   | ****               |
|                        |                                                      | L-cysteine             | D-valine        | 4 | Unpaired       | p<0.0001 | ****               |
|                        |                                                      | L-alanine              | D-valine        | 4 | Unpaired       | 0.0033   | **                 |
| 5d                     | D-valine interaction with other D- and L-amino acids | D-valine-D-cysteine    | D-valine DIW    | 4 | Unpaired       | P<0.0001 | ****               |
|                        |                                                      | D-valine-D-alanine     | D-valine DIW    | 4 | Unpaired       | P<0.0001 | ****               |
|                        |                                                      | D-valine-L-cysteine    | D-valine DIW    | 4 | Unpaired       | 0.2143   | ns                 |
|                        |                                                      | D-valine-L-alanine     | D-valine DIW    | 4 | Unpaired       | 0.1646   | ns                 |
|                        |                                                      | D-valine-L-valine      | D-valine DIW    | 4 | Unpaired       | 0.1575   | ns                 |
| 6a                     | Single factor screen D-valine analogs                | (S)-3-ABA              | 4-ABA           | 4 | Unpaired       | 0.0115   | *                  |
|                        |                                                      | L-AABA                 | 4-ABA           | 4 | Unpaired       | P<0.0001 | ****               |
|                        |                                                      | D-AABA                 | 4-ABA           | 4 | Unpaired       | 0.0107   | *                  |
|                        |                                                      | L-norvaline            | 4-ABA           | 4 | Unpaired       | 0.1083   | ns                 |
|                        |                                                      | D-norvaline            | 4-ABA           | 4 | Unpaired       | P<0.0001 | ****               |
|                        |                                                      | L-valine               | 4-ABA           | 4 | Unpaired       | 0.0003   | ***                |
|                        |                                                      | D-valine               | 4-ABA           | 4 | Unpaired       | P<0.0001 | ****               |
| 6b                     | Valine analogs' interaction with other D-amino acids | L-AABA-D-cysteine      | L-AABA DIW      | 4 | Unpaired       | 0.0002   | ***                |
|                        |                                                      | L-AABA-D-alanine       | L-AABA DIW      | 4 | Unpaired       | P<0.0001 | ****               |
|                        |                                                      | D-AABA-D-cysteine      | D-AABA DIW      | 4 | Unpaired       | 0.0002   | ***                |
|                        |                                                      | D-AABA-D-alanine       | D-AABA DIW      | 4 | Unpaired       | P<0.0001 | ****               |
|                        |                                                      | L-norvaline-D-cysteine | L-norvaline DIW | 4 | Unpaired       | 0.1446   | ns                 |
|                        |                                                      | L-norvaline-D-alanine  | L-norvaline DIW | 4 | Unpaired       | 0.0186   | *                  |
|                        |                                                      | D-norvaline-D-cysteine | D-norvaline DIW | 4 | Unpaired       | P<0.0001 | ****               |
|                        |                                                      | D-norvaline-D-alanine  | D-norvaline DIW | 4 | Unpaired       | P<0.0001 | ****               |
|                        |                                                      | (S)-3-ABA-D-cysteine   | (S)-3-ABA DIW   | 4 | Unpaired       | 0.1513   | ns                 |
|                        |                                                      | (S)-3-ABA-D-alanine    | (S)-3-ABA DIW   | 4 | Unpaired       | 0.0044   | **                 |
| 6c                     | Dose response curve valine analogs                   | L-AABA                 | L-cysteine      | 4 | Unpaired       | 0.1901   | ns                 |
|                        |                                                      | D-norvaline            | L-cysteine      | 4 | Unpaired       | 0.8813   | ns                 |
| Supplementary Fig. S2c | Purines and L-cys single factor screen               | Hx-L-cys 10 mM         | Hx              | 4 | Unpaired       | P<0.0001 | ****               |
|                        |                                                      | Ado-L-cys 10 mM        | Ado             | 4 | Unpaired       | P<0.0001 | ****               |
|                        |                                                      | Ino-L-cys 10 mM        | Ino             | 4 | Unpaired       | P<0.0001 | ****               |
|                        |                                                      | Xao-L-cys 10 mM        | Xao             | 4 | Unpaired       | P<0.0001 | ****               |
|                        |                                                      | Xan-L-cys 10 mM        | Xan             | 4 | Unpaired       | 0.0034   | **                 |
|                        |                                                      | Water-L-cys 10 mM      | Water           | 4 | Unpaired       | 0.0001   | ****               |
|                        |                                                      | Solvent-L-cys 10 mM    | Solvent         | 4 | Unpaired       | P<0.0001 | ****               |
|                        |                                                      | DIW L-cys 1 mM         | DIW-DIW         | 4 | Unpaired       | 0.0754   | ns                 |
| Supplementary Fig. S2d | L-cys-Hyp-Ino physiological concentration            | Hx-L-cys 1 mM          | Hx-DIW          | 4 | Unpaired       | 0.0007   | ***                |
|                        |                                                      | Ino-L-cys 1 mM         | Ino-DIW         | 4 | Unpaired       | 0.0196   | *                  |
|                        |                                                      | Hx-Ino L-cys 1mM       | Hx-Ino-DIW      | 4 | Unpaired       | 0.0997   | ns                 |
|                        |                                                      | DIW L-cys 10 mM        | DIW-DIW         | 4 | Unpaired       | P<0.0001 | ****               |
|                        |                                                      | Hx L-cys 10 mM         | Hx-DIW          | 4 | Unpaired       | P<0.0001 | ****               |
|                        |                                                      | Ino L-cys 10 mM        | Ino-DIW         | 4 | Unpaired       | P<0.0001 | ****               |
|                        |                                                      | Hx-Ino L-cys 10 mM     | Hx-Ino -DIW     | 4 | Unpaired       | P<0.0001 | ****               |

**Supplementary Table 5. Summary table of statistical analysis parameters for all non-combinatorial experiments in the study.** Table shows the p values of column wise comparison of each condition with relevant controls for all single factor experiments in the study. All comparisons utilized the student's unpaired t-test where n refers to the number of biologically independent samples used for the tests. Significance levels were indicated using the following convention \*\*\*\*p≤0.0001, \*\*\*p≤0.001, \*\*p≤0.01, \*p≤0.05, ns p>0.5. ABA refers to aminobutyric acid.

| <b><i>C. novyi</i>-NT<br/>gene query</b> | <b>Protein hit</b>                            | <b>Organism</b>                           | <b>E value</b> | <b>%<br/>Identity</b> | <b>Accession number</b>        |
|------------------------------------------|-----------------------------------------------|-------------------------------------------|----------------|-----------------------|--------------------------------|
| NT01CX_0562                              | Spore germination protein<br>GerKC [Bacillus] | <i>Bacillus</i> spp.                      | 3.00E-06       | 20.58                 | <a href="#">WP_000484123.1</a> |
| NT01CX_0563                              | Spore germination protein<br>GerIB            | <i>B. cereus</i> 10876                    | 4.00E-19       | 21.26                 | <a href="#">AAD03542.1</a>     |
| NT01CX_0564                              | GerA spore germination<br>family protein      | <i>B. cereus</i> 10876                    | 1.00E-132      | 39.87                 | <a href="#">KFL74316.1</a>     |
| NT01CX_0189                              | Spore germination protein<br>GerLC            | <i>B. cereus</i> 10876                    | 3.00E-10       | 22.17                 | <a href="#">AAK70463.1</a>     |
| NT01CX_0190                              | Spore germination protein<br>GerIB            | <i>B. cereus</i> 10876                    | 2.00E-21       | 23.22                 | <a href="#">AAD03542.1</a>     |
| NT01CX_0191                              | Spore germination protein<br>GerKA            | <i>B. cereus</i> 10876                    | 4.00E-96       | 34.23                 | <a href="#">EEK52439.1</a>     |
| NT01CX_0562                              | Ger(x)C family spore<br>germination protein   | <i>C. botulinum</i>                       | 4.00E-106      | 39.09                 | <a href="#">WP_003356649.1</a> |
| NT01CX_0563                              | Spore germination protein                     | <i>C. botulinum</i> A1 str<br>CFSAN002368 | 4.00E-101      | 42.86                 | <a href="#">EPS52744.1</a>     |
| NT01CX_0564                              | Spore germination protein<br>GerA             | <i>C. botulinum</i> A1 str<br>CFSAN002368 | 4.00E-74       | 35.47                 | <a href="#">EPS52609.1</a>     |
| NT01CX_0189                              | Germination protein GerC<br>family            | <i>C. botulinum</i> A1 str<br>CFSAN002368 | 4.00E-15       | 66.67                 | <a href="#">EPS52611.1</a>     |
| NT01CX_0190                              | Spore germination protein                     | <i>C. botulinum</i> A1 str<br>CFSAN002368 | 3.00E-23       | 25                    | <a href="#">EPS52744.1</a>     |
| NT01CX_0191                              | Spore germination protein<br>GerA             | <i>C. botulinum</i> A1 str<br>CFSAN002368 | 2.00E-138      | 51.91                 | <a href="#">EPS52609.1</a>     |

**Supplementary Table 6. Prediction of putative germinant receptors in *C. novyi*-NT.** Protein sequences from the *C. novyi*-NT genome predicted to be germination proteins were BLASTP queried against the genomes of *B. cereus* 10876 and *C. botulinum* strain A to identify analogous Ger family proteins.

|                             | <i>C. difficile</i> | <i>C. frigidicamisi</i> | <i>C. perfringens</i> (Non foodborne) | <i>C. novyi</i> -NT | <i>C. perfringens</i> (foodborne) | <i>C. botulinum</i> (non-proteolytic) | <i>C. bifermentans</i> | <i>C. roseum</i> | <i>C. sordelli</i> | <i>C. sporogenes</i> | <i>C. botulinum</i> (proteolytic) | <i>C. butyricum</i> | <i>C. botulinum</i> group IV Type G | <i>C. tetani</i> | <b>Total</b> | <b>% of surveyed clostridia</b> |
|-----------------------------|---------------------|-------------------------|---------------------------------------|---------------------|-----------------------------------|---------------------------------------|------------------------|------------------|--------------------|----------------------|-----------------------------------|---------------------|-------------------------------------|------------------|--------------|---------------------------------|
| L-Alanine                   | ✓                   | ✓                       | ✓                                     | ✓                   |                                   | ✓                                     | ✓                      | ✓                | ✓                  | ✓                    | ✓                                 |                     |                                     |                  | <b>10</b>    | 71.4%                           |
| L-Cysteine                  | ✓                   | ✓                       | ✓                                     | ✓                   | ✓                                 | ✓                                     |                        |                  |                    |                      |                                   | ✓                   | ✓                                   |                  | <b>8</b>     | 57.1%                           |
| L-Phenylalanine             | ✓                   |                         |                                       |                     |                                   |                                       | ✓                      | ✓                | ✓                  |                      |                                   |                     |                                     |                  | <b>4</b>     | 28.6%                           |
| L-Serine                    |                     | ✓                       | ✓                                     |                     | ✓                                 | ✓                                     |                        |                  |                    |                      |                                   |                     |                                     |                  | <b>4</b>     | 28.6%                           |
| L-Threonine                 |                     | ✓                       | ✓                                     |                     | ✓                                 |                                       |                        |                  |                    |                      |                                   |                     |                                     |                  | <b>3</b>     | 21.4%                           |
| L-Norvaline                 | ✓                   | ✓                       |                                       | ✓                   |                                   |                                       |                        |                  |                    |                      |                                   |                     |                                     |                  | <b>3</b>     | 21.4%                           |
| L-Arginine                  | ✓                   |                         |                                       |                     |                                   |                                       | ✓                      | ✓                | ✓                  |                      |                                   |                     |                                     |                  | <b>4</b>     | 28.6%                           |
| L-Valine                    |                     | ✓                       | ✓                                     | ✓                   |                                   |                                       |                        |                  |                    |                      |                                   |                     |                                     |                  | <b>3</b>     | 21.4%                           |
| L-2-Aminobutyric acid       | ✓                   |                         |                                       | ✓                   |                                   |                                       |                        |                  |                    |                      |                                   |                     |                                     |                  | <b>2</b>     | 14.3%                           |
| Glycine                     | ✓                   | ✓                       |                                       |                     |                                   |                                       |                        |                  |                    |                      |                                   |                     |                                     |                  | <b>2</b>     | 14.3%                           |
| L-Asparagine                |                     |                         | ✓                                     |                     | ✓                                 |                                       |                        |                  |                    |                      |                                   |                     |                                     |                  | <b>2</b>     | 14.3%                           |
| L-Methionine                |                     |                         |                                       |                     |                                   |                                       |                        |                  |                    |                      |                                   |                     |                                     | ✓                | <b>1</b>     | 7.1%                            |
| L-Glutamine                 |                     |                         |                                       |                     | ✓                                 |                                       |                        |                  |                    |                      |                                   |                     |                                     |                  | <b>1</b>     | 7.1%                            |
| <b>Total</b>                | <b>7</b>            | <b>7</b>                | <b>6</b>                              | <b>5</b>            | <b>5</b>                          | <b>3</b>                              | <b>3</b>               | <b>3</b>         | <b>3</b>           | <b>1</b>             | <b>1</b>                          | <b>1</b>            | <b>1</b>                            | <b>1</b>         |              |                                 |
| % of surveyed L-amino acids | 53.8%               | 53.8%                   | 46.2%                                 | 38.5%               | 38.5%                             | 23.1%                                 | 23.1%                  | 23.1%            | 23.1%              | 7.7%                 | 7.7%                              | 7.7%                | 7.7%                                | 7.7%             |              |                                 |

**Supplementary Table 7. Comparison of *C. novyi*-NT pro-germination L-amino acid factors with other Clostridia adapted from Bhattacharjee *et al* <sup>45</sup>. Green shaded boxes with ticks indicate pro-germination factors for corresponding Clostridia.**



| Figure | Model type      | Factors                                        | # of Factors | SD    | R <sup>2</sup> |
|--------|-----------------|------------------------------------------------|--------------|-------|----------------|
| 1b, S1 | Plackett-Burman | L-amino acids                                  | 20           | 0.123 | 92.1%          |
| 2a,b,c | Full factorial  | L-amino acid germinants                        | 5            | 0.256 | 74.14%         |
| 2d,e,f | Full factorial  | L-cys and L-amino acid germination antagonists | 5            | 0.086 | 93.07%         |
| 3a,b,c | Full factorial  | Purines (in the presence of L-cys)             | 5            | 0.219 | 72.46%         |

**Supplementary Table 8. Model fit parameters for the various DOE experimental designs performed in this study.**

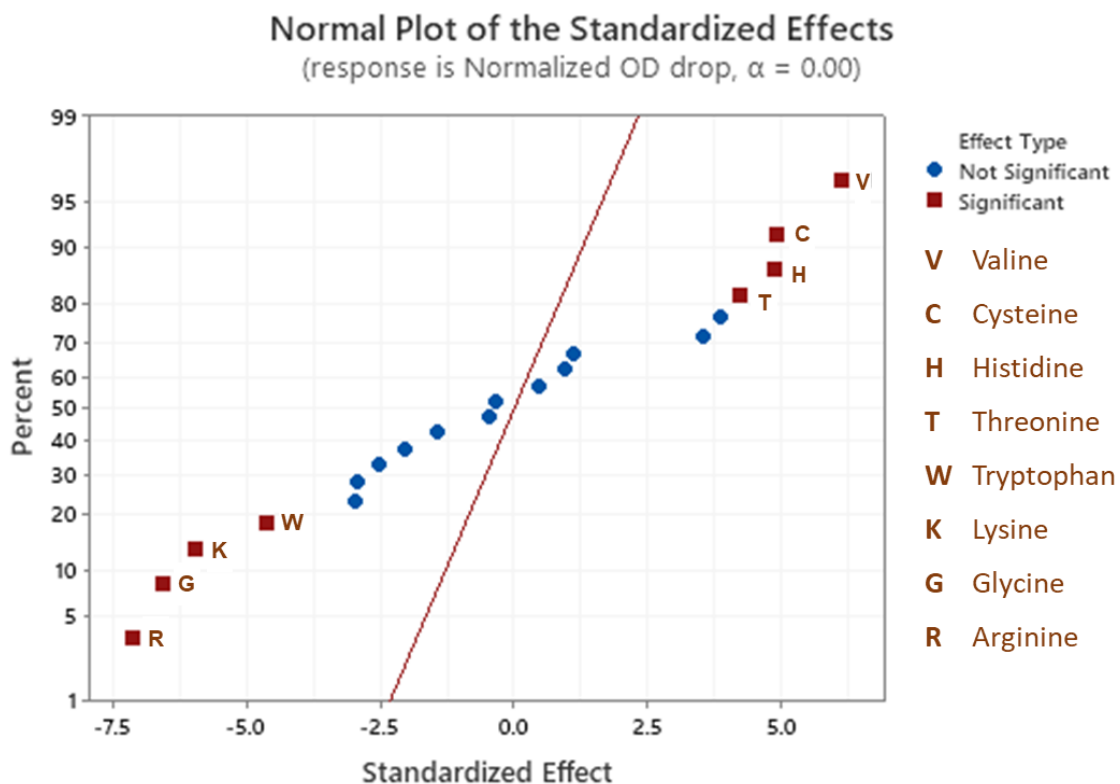

**Supplementary Fig. S1. Identification of significant pro-germination factors and antagonists.** 20 L-amino acids at concentrations in **Supplementary Table 3** were added in different combinations according to the Plackett-Burman (PB) design in **Supplementary Table 1**. The normal probability plot of the standardized effects as defined in **Supplementary Table 4** is shown for all 20 L-amino acid factors ( $\alpha = 0.0005$ ). Solid line represents line fit to a normal distribution. Significant factor effects are indicated by red squares while non-significant factor effects are indicated by blue circles.

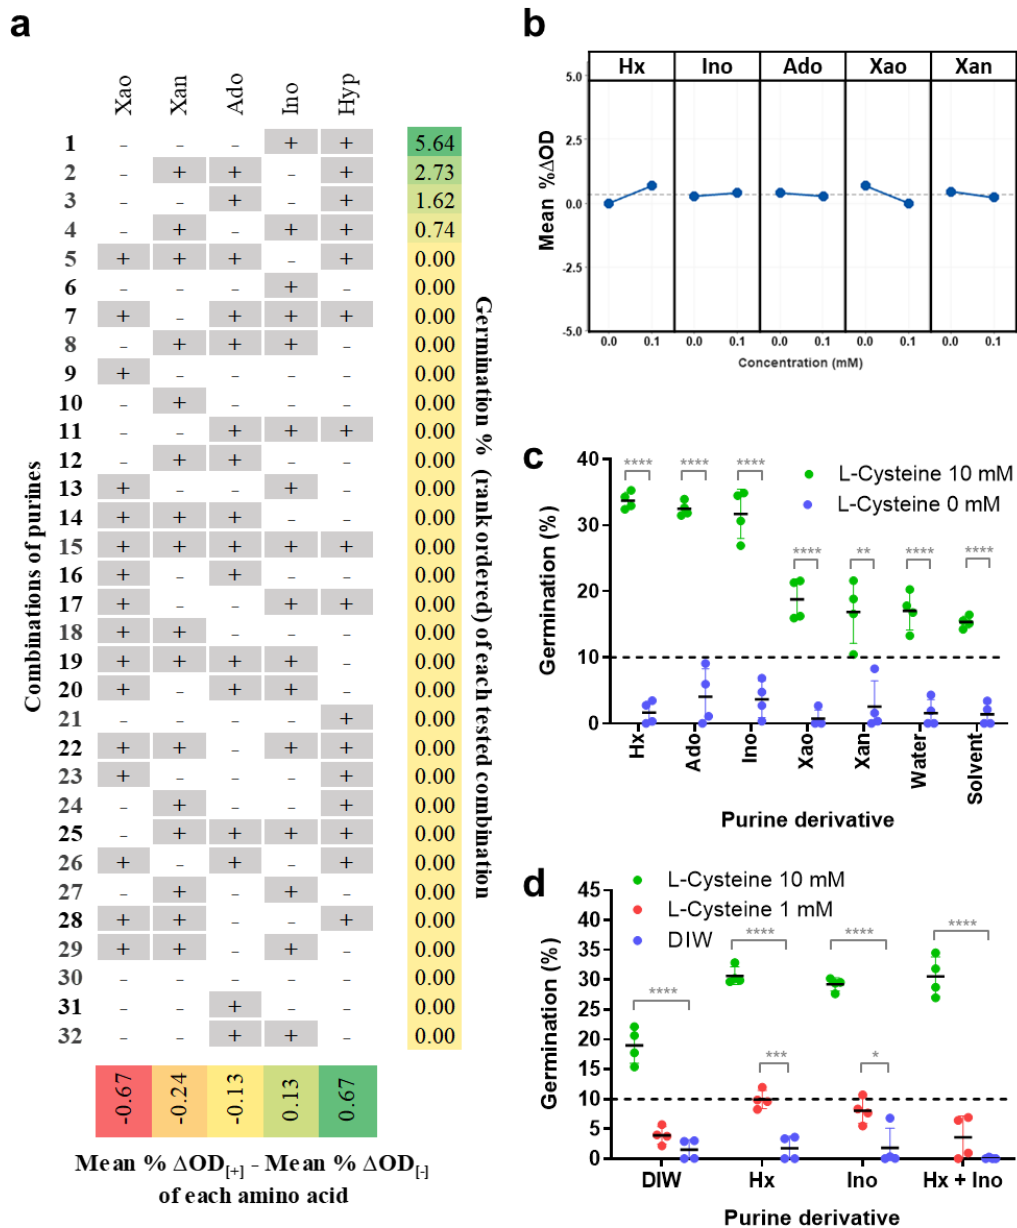

**Supplementary Fig. S2. Purine germinant and co-germinant screens.** (a) Figure depicts the different combinations of purines in the absence of main germinant L-cysteine according to the factorial design in **Supplementary Table 2**, sorted in decreasing order (from top to bottom) of average values of germination % as defined in **Supplementary Table 4**. Figure also shows the effect (bottom row) of each purine on the germination % arranged in increasing order from left to right. (b) Main interaction plot for full factorial design with purines (0.1 mM) in absence of L-cysteine (blue lines with circles, model  $\alpha = 0.0005$ ). (c) Single factor co-germinant screen in presence of L-cysteine (10 mM) and No L-cysteine; Purine concentration (0.1 mM). Solvent control refers to control with diluted NaOH used for dissolution of purines. Significant at \*\*\*\* $p \leq 0.0001$ , \*\*\* $p \leq 0.001$ , \*\* $p \leq 0.01$  (unpaired t-test) when compared with no L-cysteine for each purine and control. (d) Germination in presence of L-cysteine (1 mM), hypoxanthine and inosine (0.1 mM) at physiological concentrations. Significant at \*\*\*\* $p \leq 0.0001$ , \*\*\* $p \leq 0.001$ , \*\* $p \leq 0.01$ , \* $p \leq 0.05$ , ns  $p > 0.5$  when compared with DIW control without L-cysteine for each condition. All data were averaged from two independent experiments with two replicates each and depict mean response values for a, b and mean  $\pm$  SD,  $n=4$  biologically independent samples for c, d. Green, red, blue circles indicate 10 mM, 1 mM and 0 mM L-cysteine respectively in c, d.

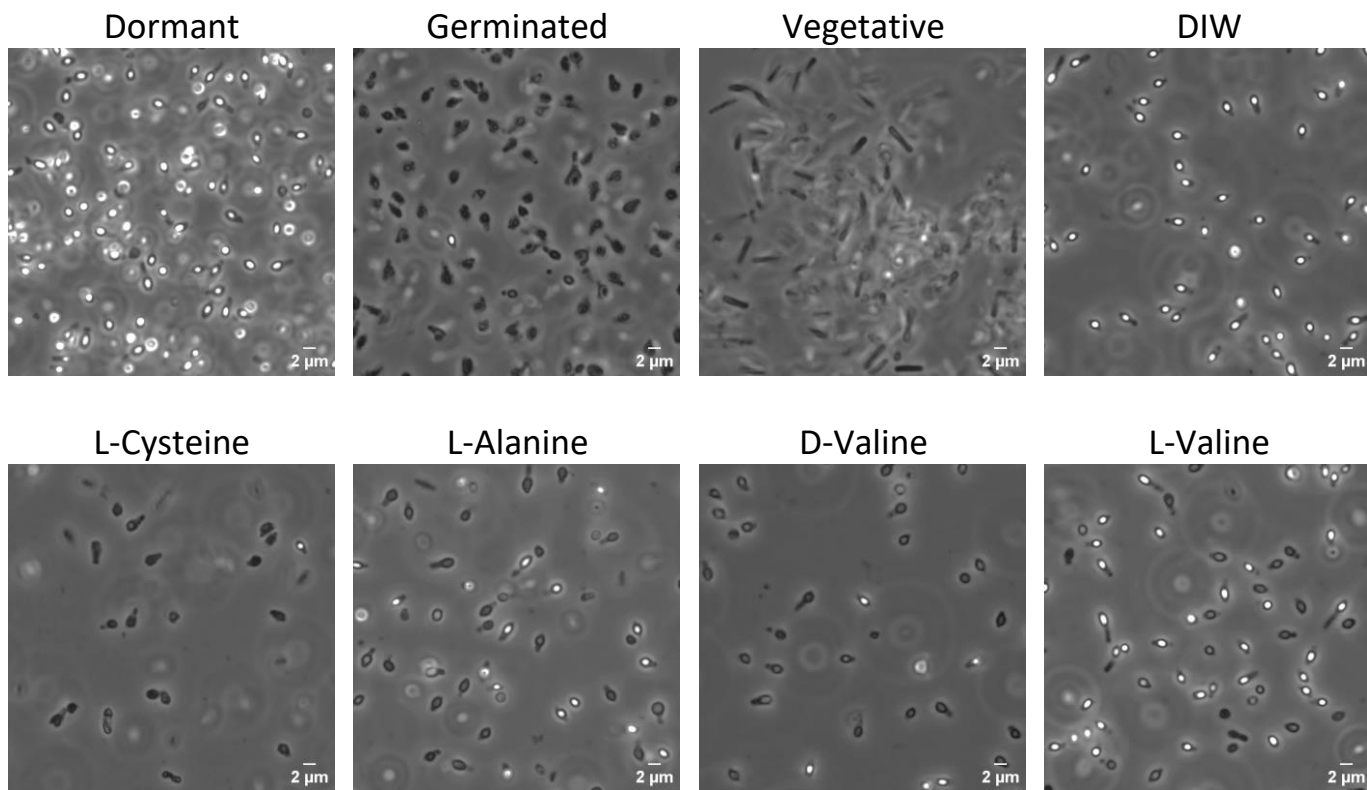

**Supplementary Fig. S3. Phase contrast images of samples used for LC-MS analysis.** Figure shows best representative phase contrast images of dormant, germinated and vegetative *C. novyi-NT* spore samples used for peptidoglycan extract analysis and spore samples used for germination with L-cysteine, L-alanine, L-valine, D-valine or DIW for the supernatant analysis. DIW refers to water control containing oxyrase. 1600X magnification, Scale bar 2 μm.

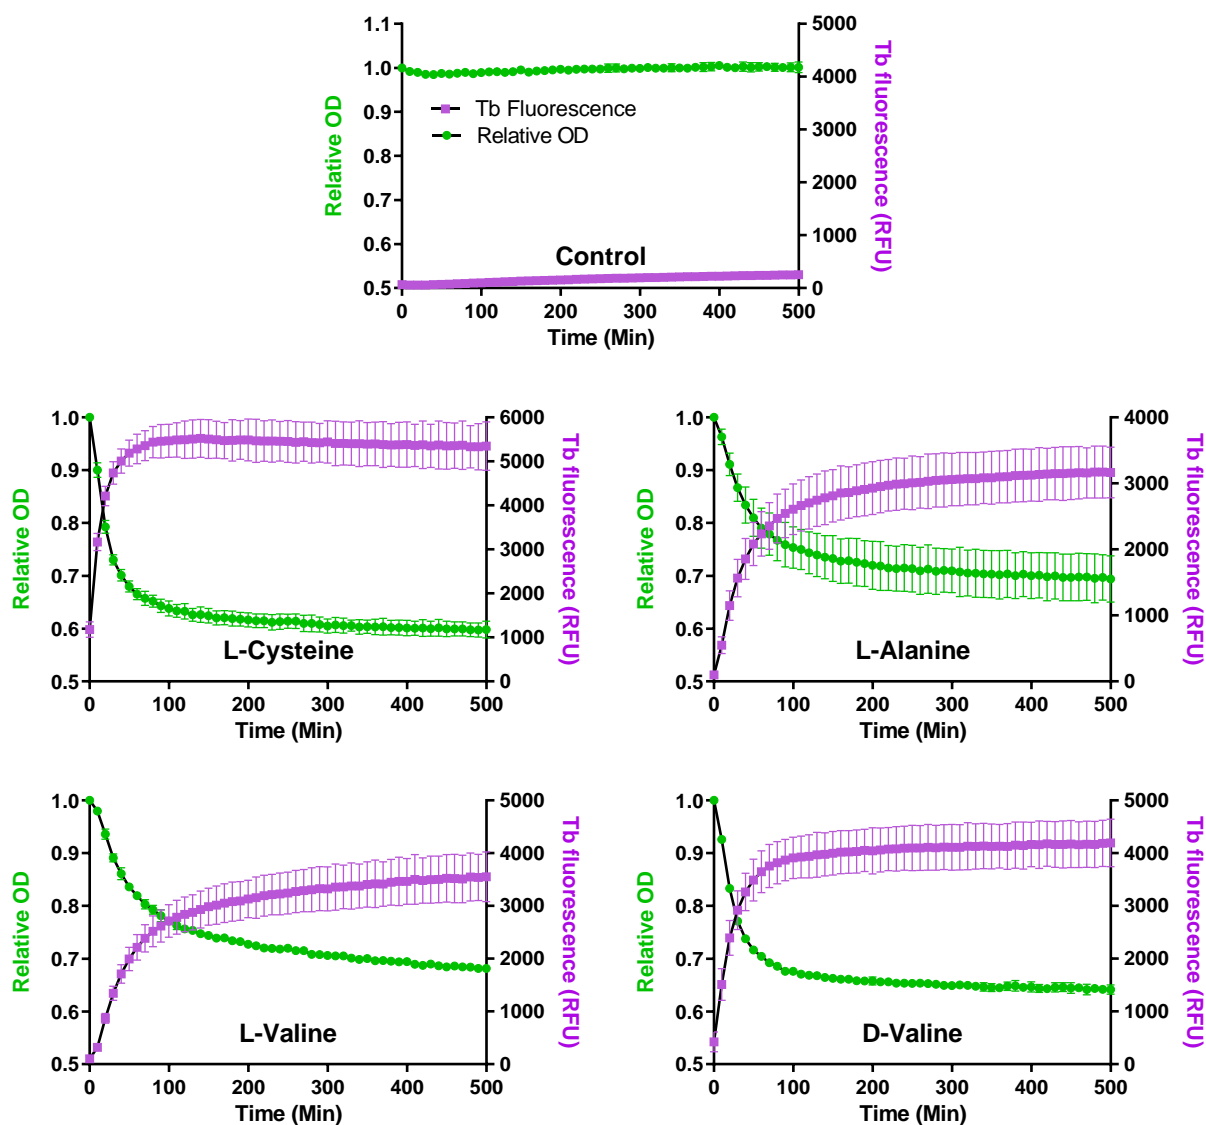

**Supplementary Fig. S4. D-Valine shows similar germination and DPA release kinetics as L-cysteine.** Spores were germinated with L-cysteine, L-alanine, L-valine, D-valine and water control, with an amino acid concentration of 93.5 mM in the presence of Terbium chloride (0.09 mM). All germination data depict mean  $\pm$  SD,  $n=4$  biologically independent samples. The OD600 relative to the initial starting OD600 (green circles) as defined in **Supplementary Table 4** is measured on the left Y-axis. The increase in Tb fluorescence over time at 545 nm (purple squares) is measured on the right Y-axis.

|                                                                                                                |                                                                                                                  |                                                                                                                      |                                                                                                                        |
|----------------------------------------------------------------------------------------------------------------|------------------------------------------------------------------------------------------------------------------|----------------------------------------------------------------------------------------------------------------------|------------------------------------------------------------------------------------------------------------------------|
| L-Valine<br>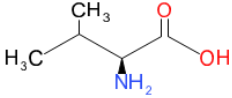                  | D-Valine<br>                    | Sodium (S)-3-Hydroxyisobutyrate<br> | Sodium (R)-3-Hydroxyisobutyrate<br> |
| L-Norvaline<br>                | D-Norvaline<br>                 | D-2-Hydroxyisovaleric acid<br>      | L-2-Hydroxyisovaleric acid<br>      |
| L-2-Aminobutyric acid<br>     | D-2-Aminobutyric acid<br>       |                                                                                                                      |                                                                                                                        |
| (S)-3-Aminobutyric acid<br> | 4-Aminobutyric acid<br>       | β-Alanine<br>                     |                                                                                                                        |
| Isovaleric acid<br>         | (R)-2-Hydroxybutyric acid<br> | Sodium-3-Methyl-2-oxobutyrate<br> | Butyric acid<br>                  |

**Supplementary Fig. S5. Chemical structures of all stereoisomeric valine analogs used in the study.** Structures drawn using the Chem4Word plug-in in Microsoft word.

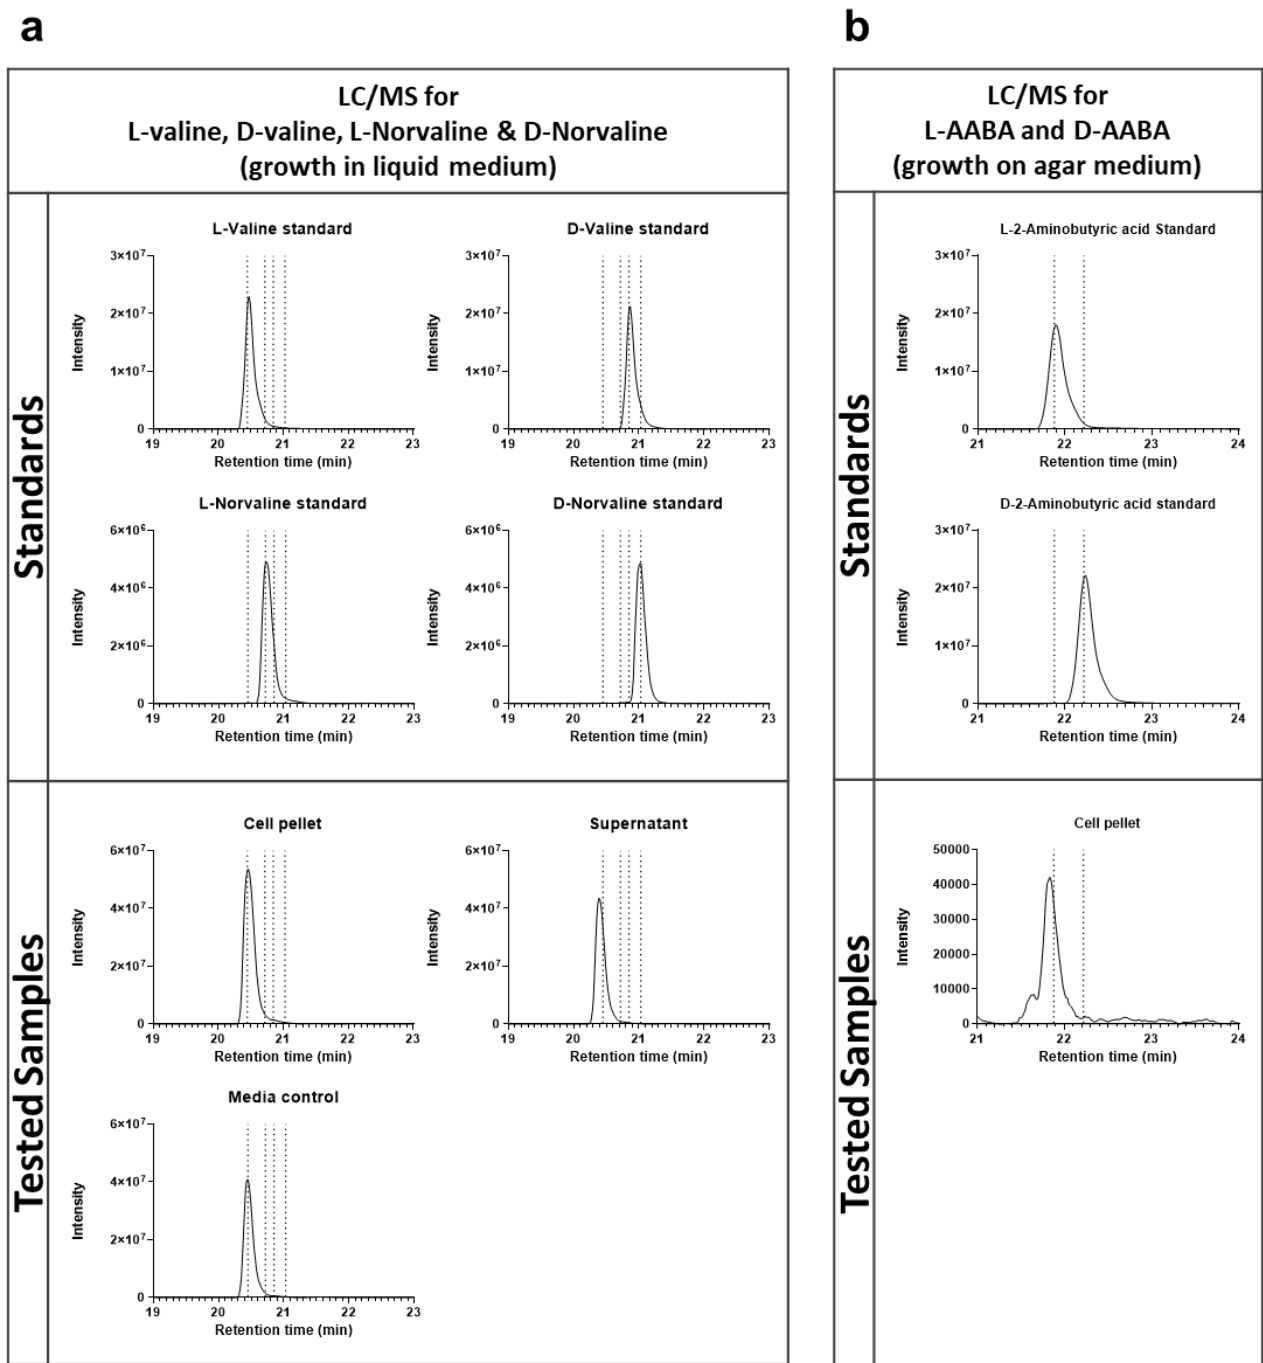

**Supplementary Fig. S6. L-2-aminobutyric acid is an intracellular metabolite produced in vegetative *C. novyi*-NT.** Overnight cultures of vegetative *C. novyi*-NT in BHI-FBS liquid medium (a) or agar plates (b) were harvested in 1X PBS and intracellular metabolites were extracted in 50% Acetonitrile after bead-beating. (a) LC-MS EIC spectra of derivatized Valine/Norvaline ion (379 m/z) for standards of L-valine, D-valine, L-norvaline, D-norvaline, and samples of Supernatant, Cell pellet and Media blank control. Data is best representative of water blank subtracted spectra from two independent experiments. Dotted lines represent the peak maxima for L-valine, D-valine, L-norvaline and D-valine at retention times of 20.45, 20.85, 20.72 and 21.03 min respectively. (b) LC-MS EIC spectra of derivatized 2-Aminobutyric acid ion (365 m/z) for Standards of L-2-aminobutyric acid, D-2-aminobutyric acid and samples of Cell pellet. Data represents media blank subtracted average spectra from two independent experiments. Spectra smoothed by using a moving average of six data points. Dotted lines represent the standard peaks for L-2-aminobutyric acid and D-2-aminobutyric acid at retention times of 21.88 and 22.22 min respectively.
